# Supplementary material
Source: PubMed Central journal article supplement (PMC6641001)
Supplement: ao7b00162_si_001.pdf [file ao7b00162_si_001.pdf]

## **Supporting Information for**

# **Making a Supertough Flame-Retardant Polylactide Composite through Reactive Blending with Ethylene-Acrylic Ester-Glycidyl Methacrylate Terpolymer and Addition of Aluminum Hypophosphite**

Shuang Li,<sup>§</sup> Liang Deng,<sup>§</sup> Cui Xu, Qianhua Wu and Zhigang Wang\*

CAS Key Laboratory of Soft Matter Chemistry, Department of Polymer Science and Engineering, Hefei National Laboratory for Physical Sciences at the Microscale, University of Science and Technology of China, Hefei, Anhui 230026, P. R. China

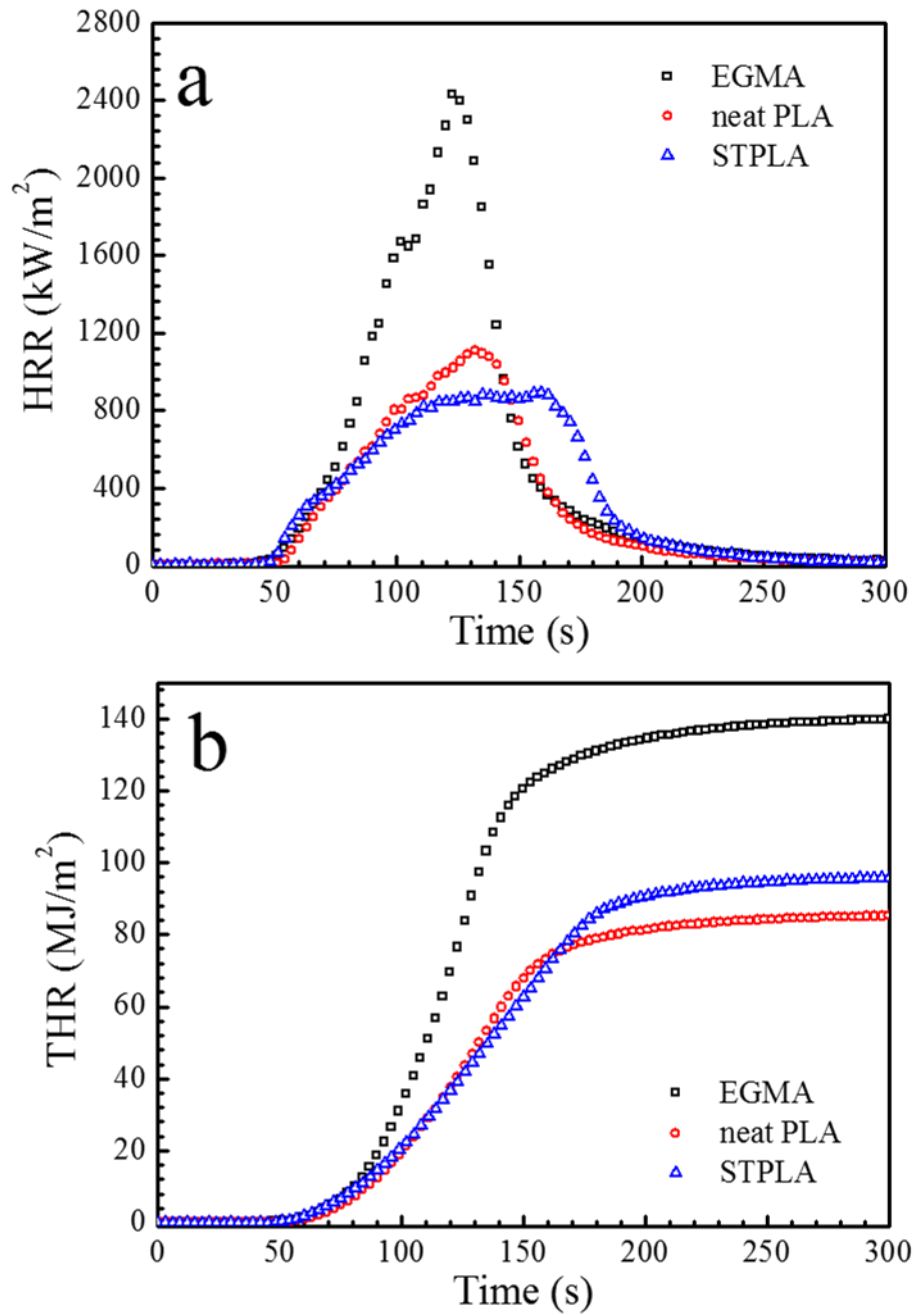

**Figure S1.** Heat release rate (HRR) curves (a) and total heat release (THR) curves (b) obtained from the cone calorimeter tests for neat PLA, EGMA and STPLA.
